# Supplementary material
Source: Springer Nature journal article supplement (https://mijn.bsl.nl/resource/supplementary/13047_2010_142_MOESM4_ESM.pdf/7110072)

Differences of session 1 and 2

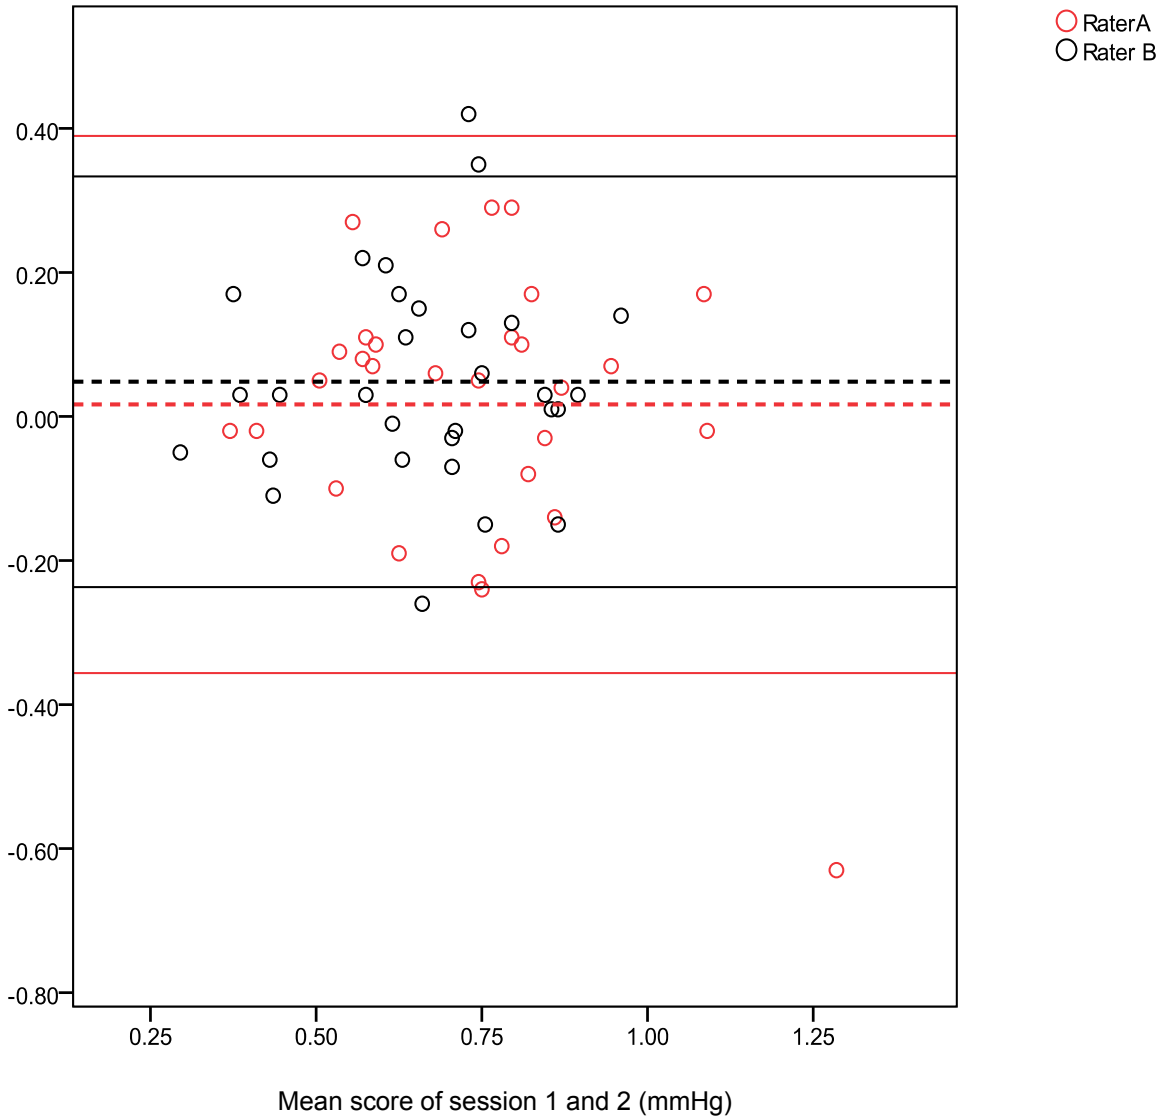

Supplement: MOESM4 [file 7110072]
